# Supplementary material for: Proteomics signature of autoimmune atrophic gastritis: towards a link with gastric cancer
Source: PubMed Central journal article supplement (PMC8064991; doi:10.1007/s10120-020-01148-3), 2021-02-23

(A)

More abundant in AAG-corpus

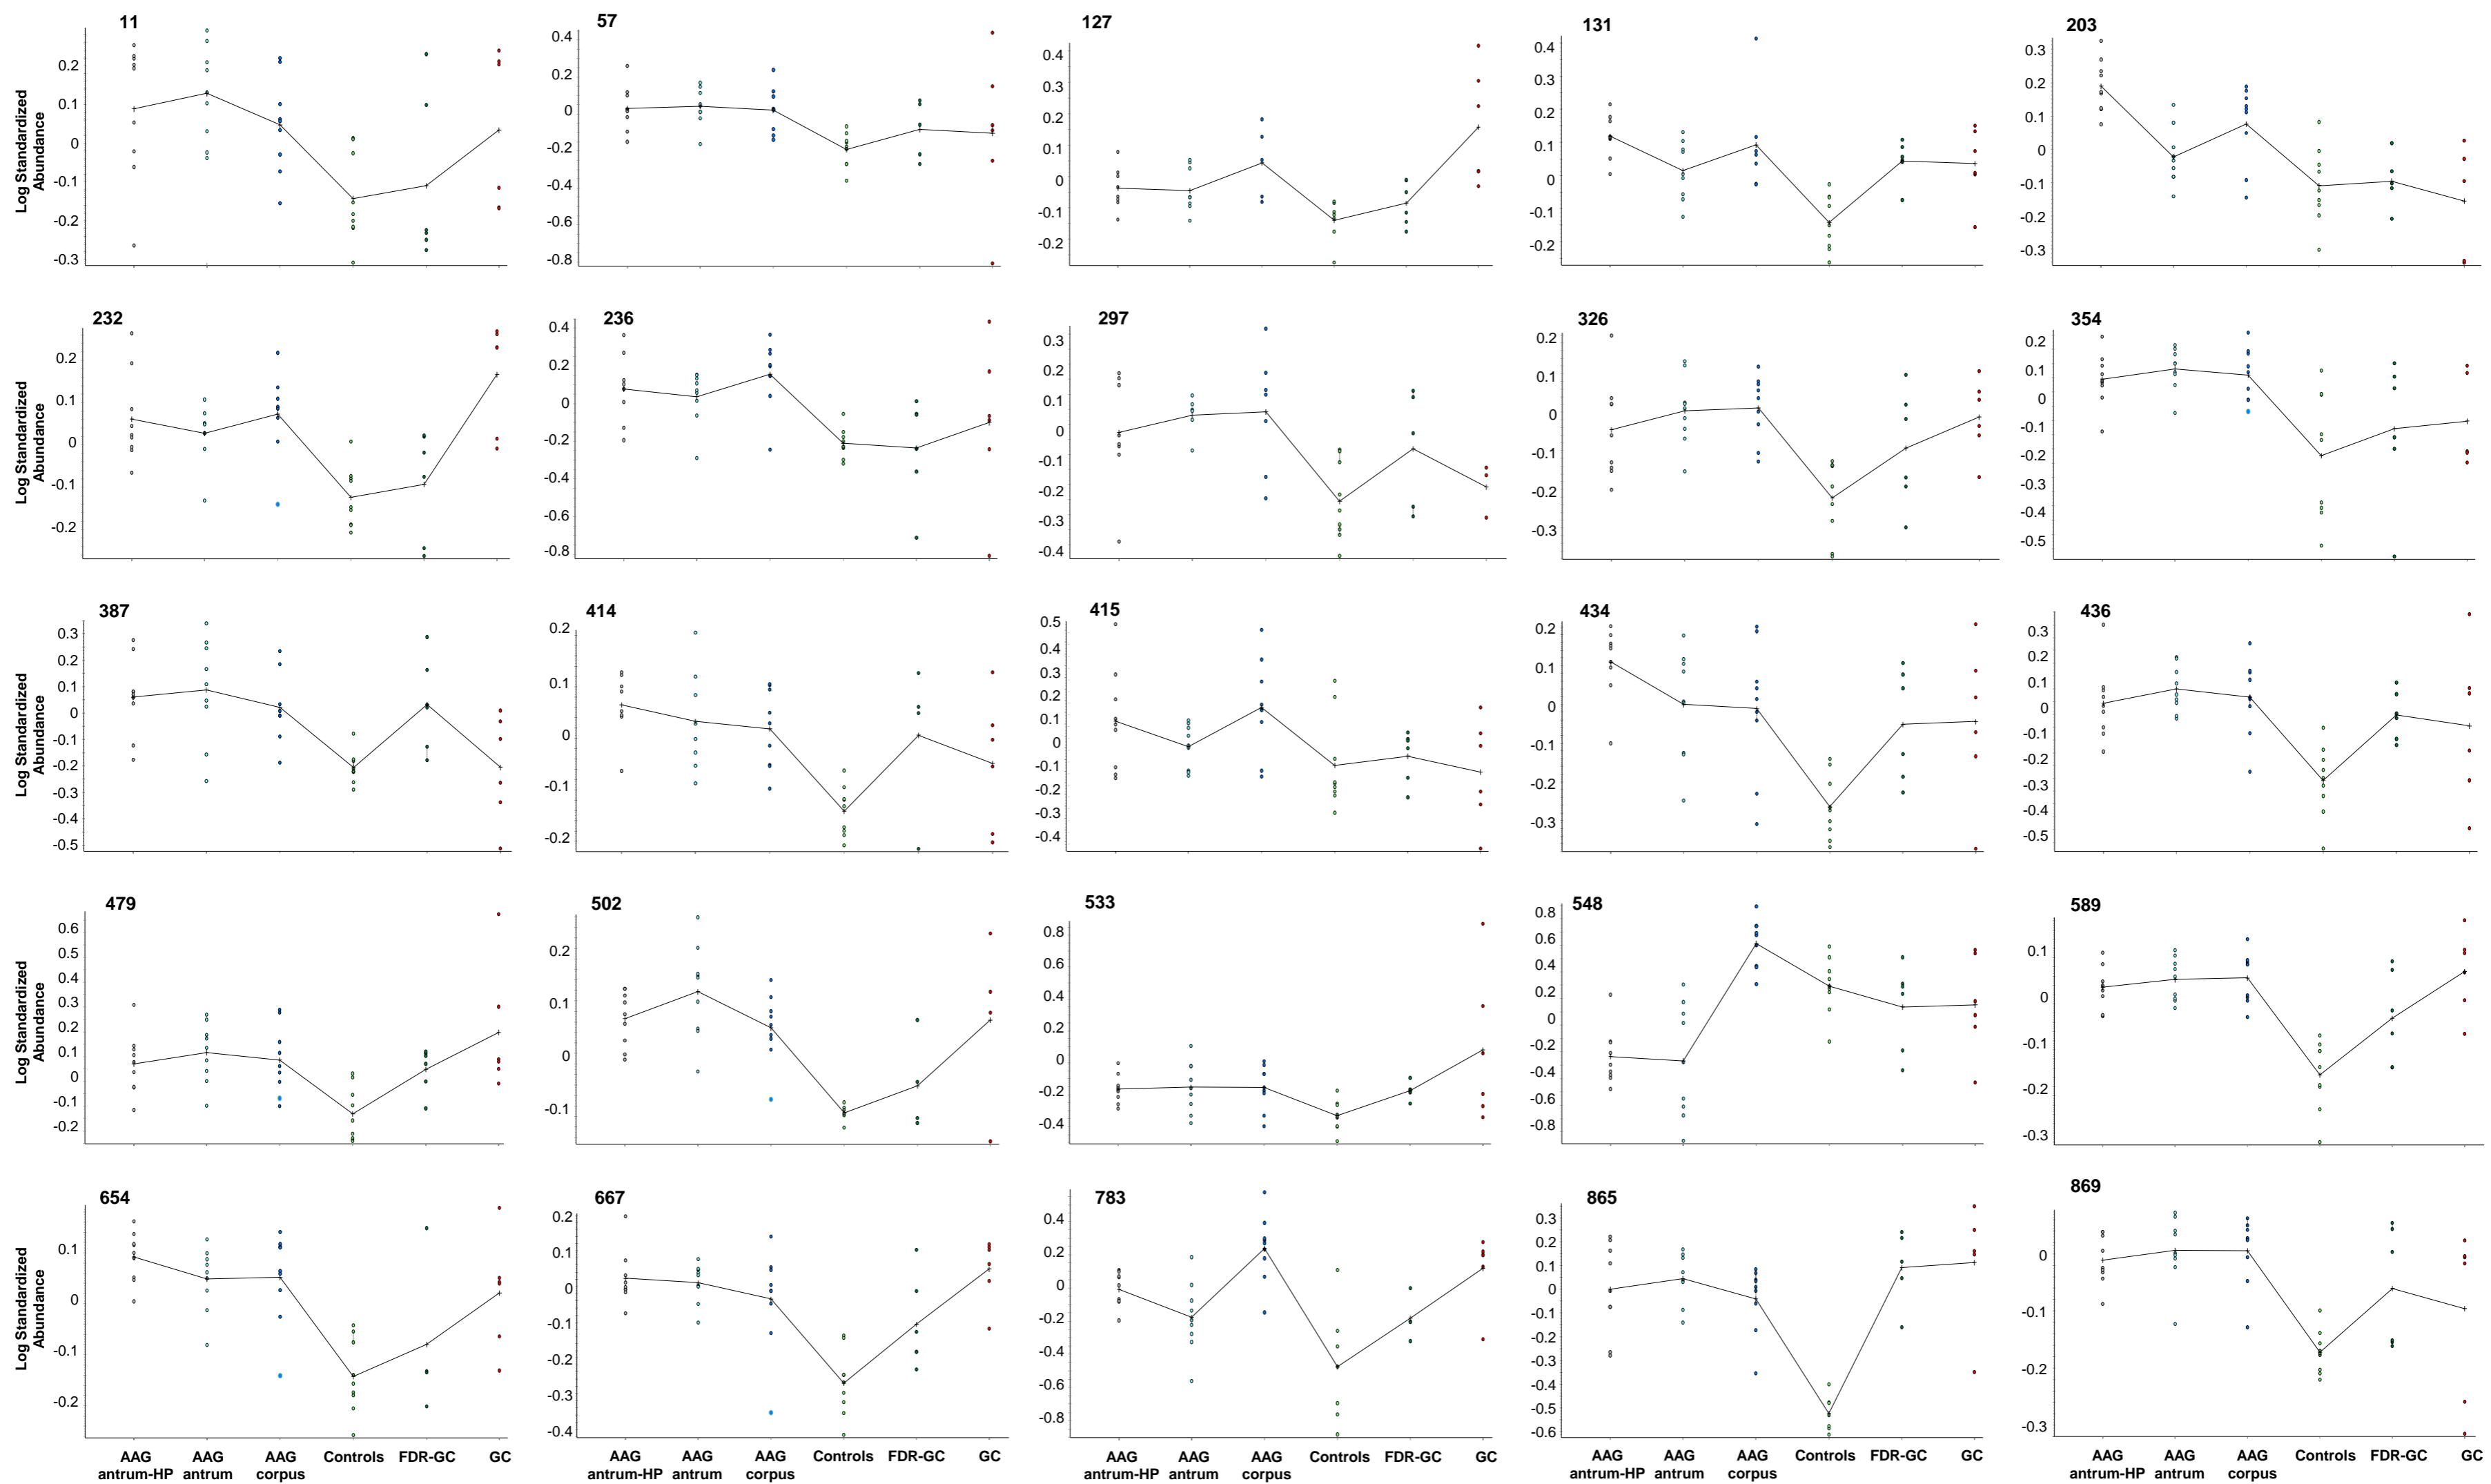

**(B)****Less abundant in AAG-corpus**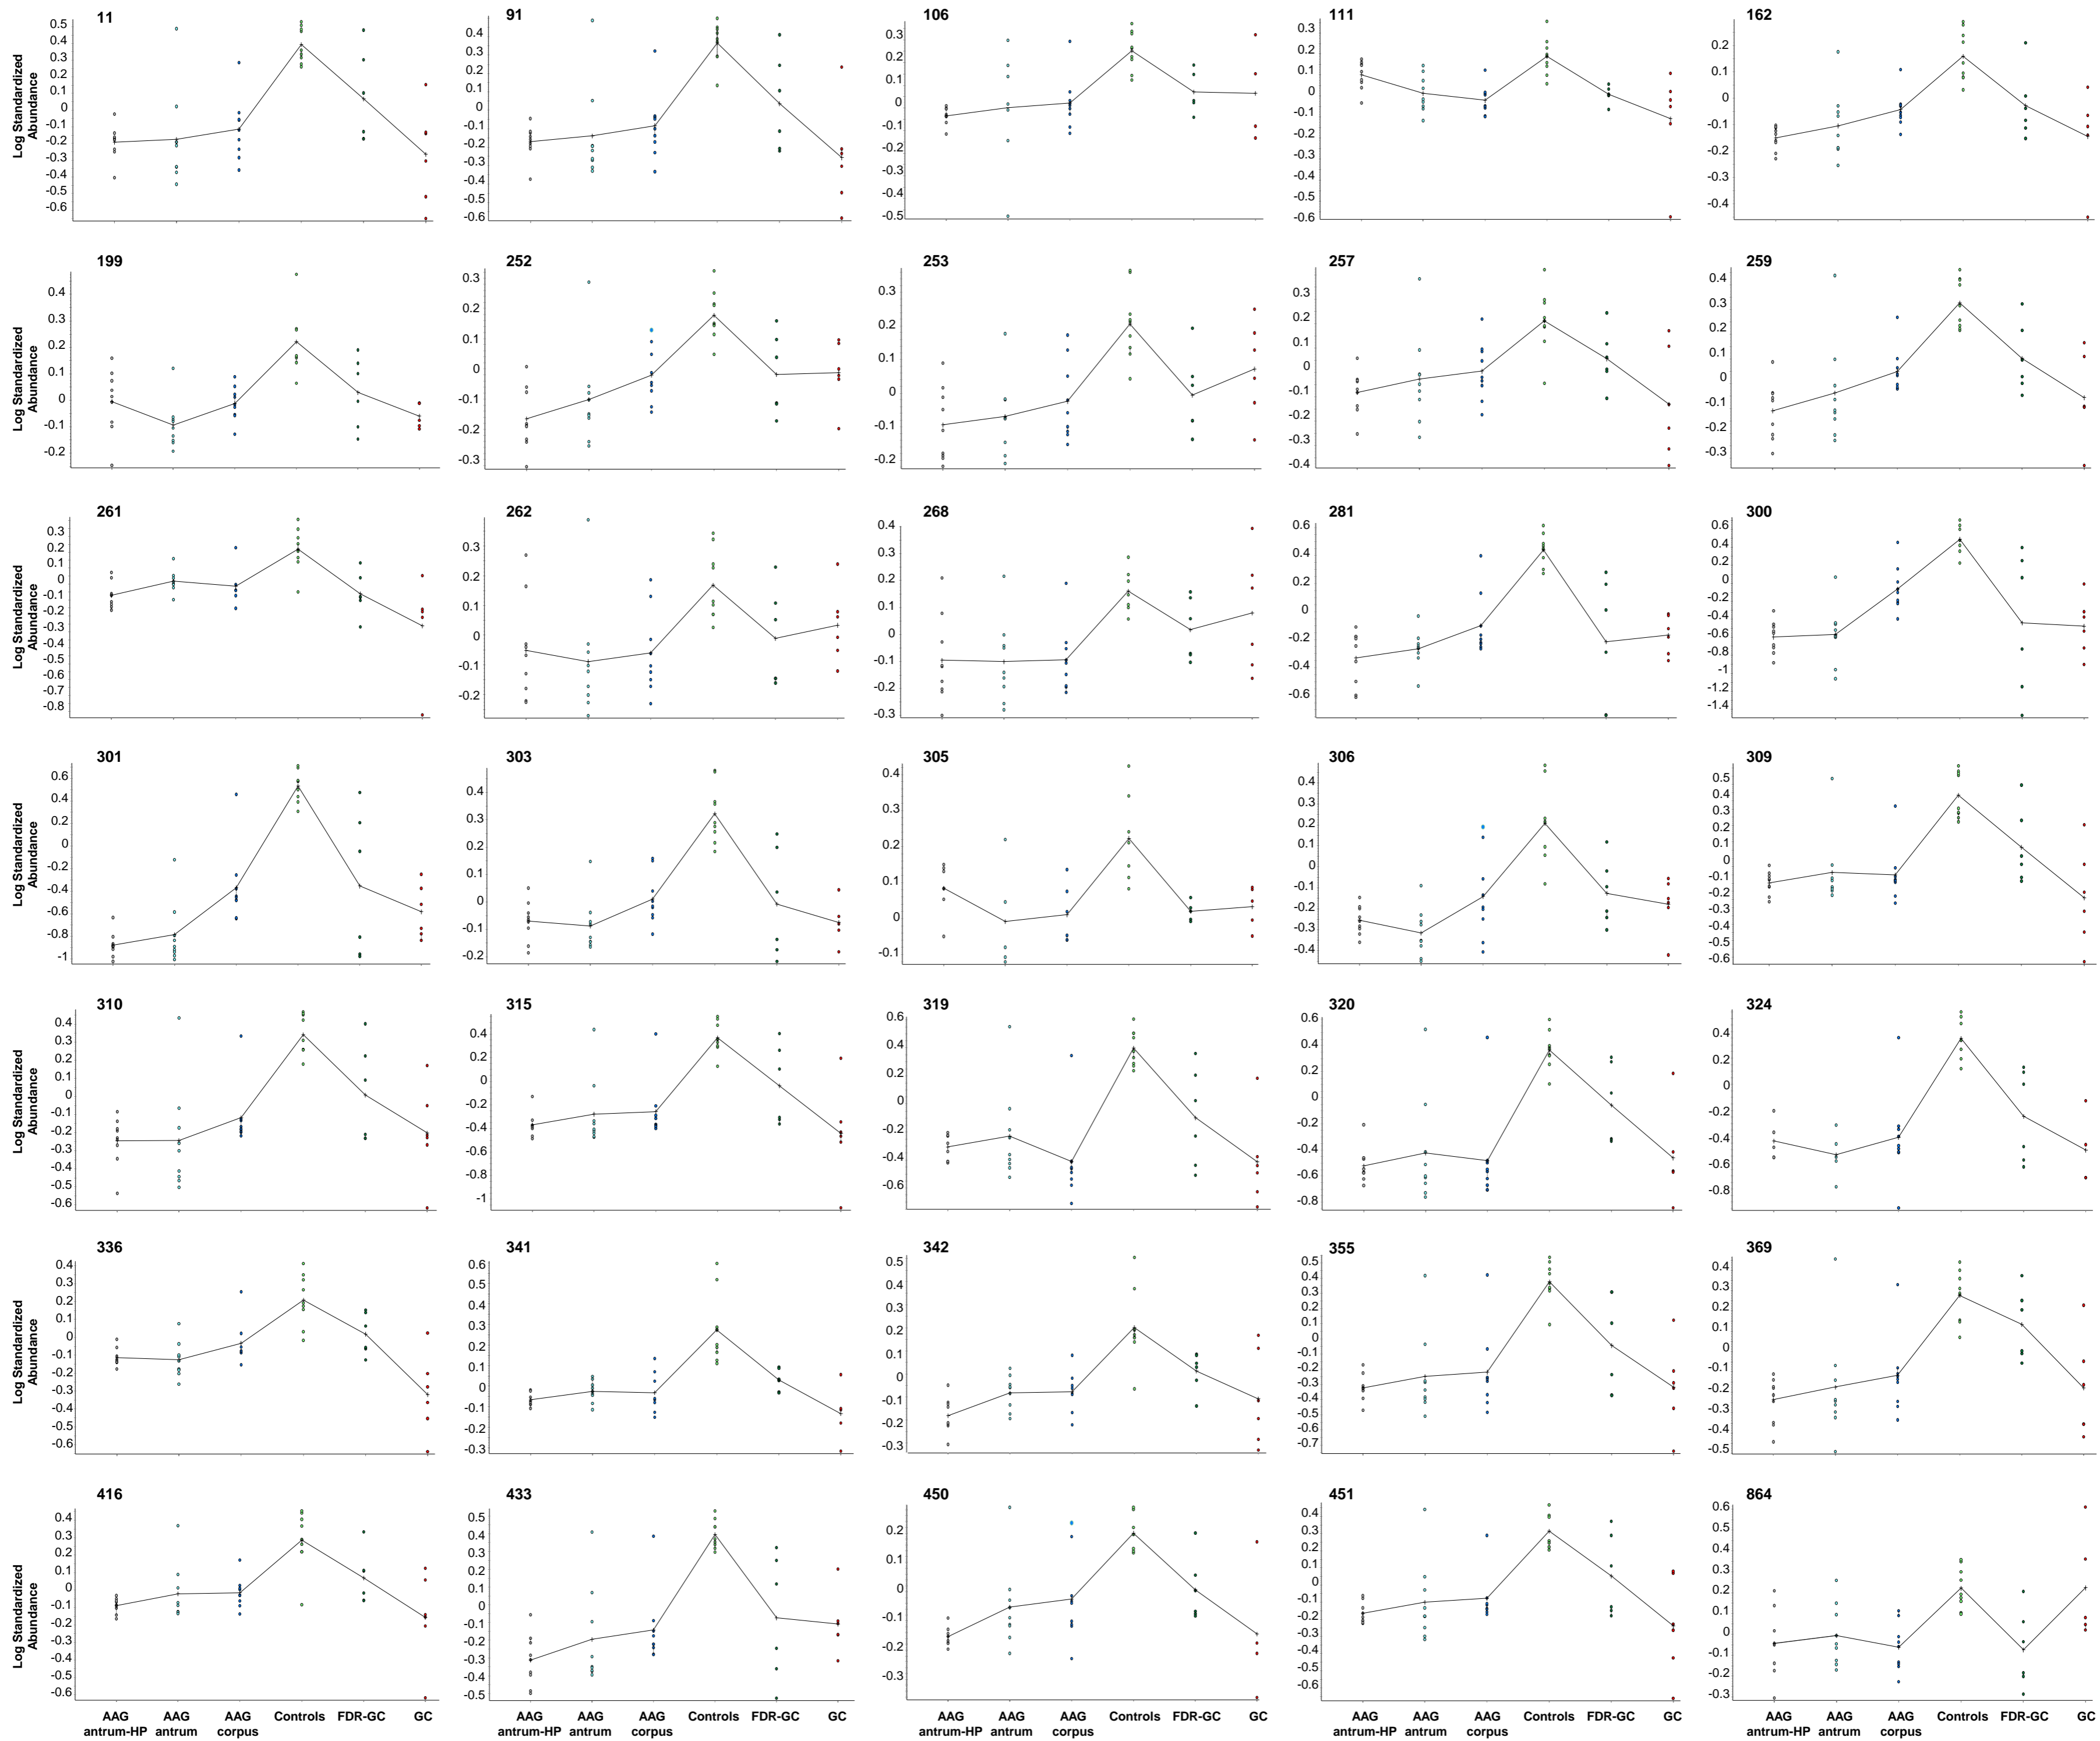

Supplement: 10120_2020_1148_MOESM1_ESM.pdf [file 10120_2020_1148_MOESM1_ESM.pdf]
